# Supplementary material for: Detection of neoplastic-immune hybrid cells with metastatic properties in uveal melanoma
Source: PubMed Central journal article supplement (PMC11264923; doi:10.1186/s40364-024-00609-6), 2024-07-20

# UMM059

A

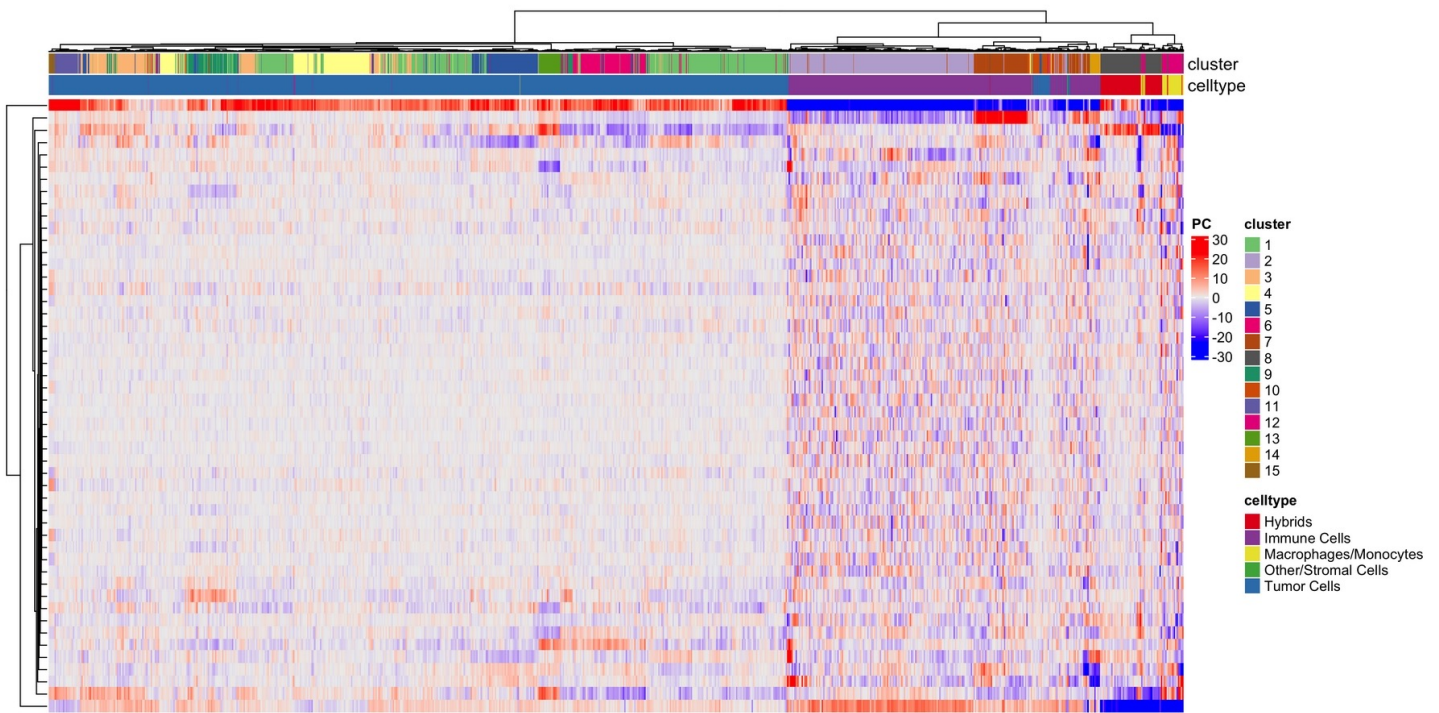

# UMM063

## A

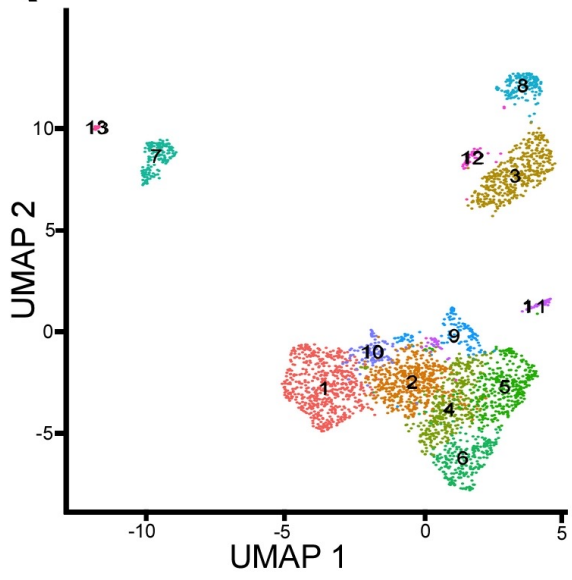

## B

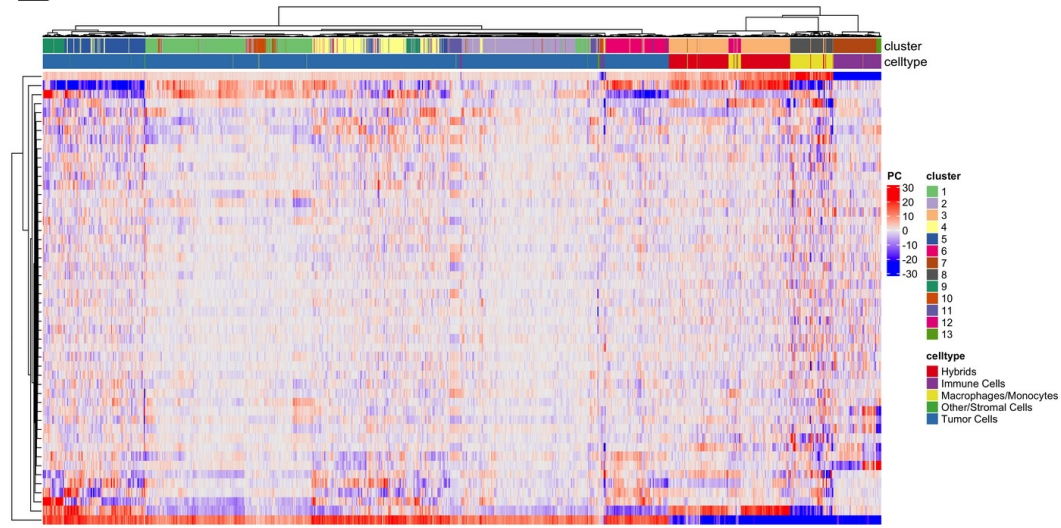

## C

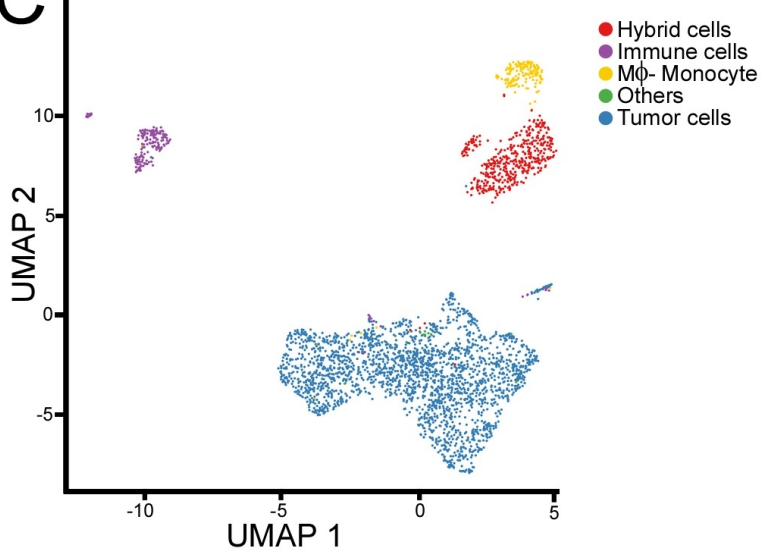

## D

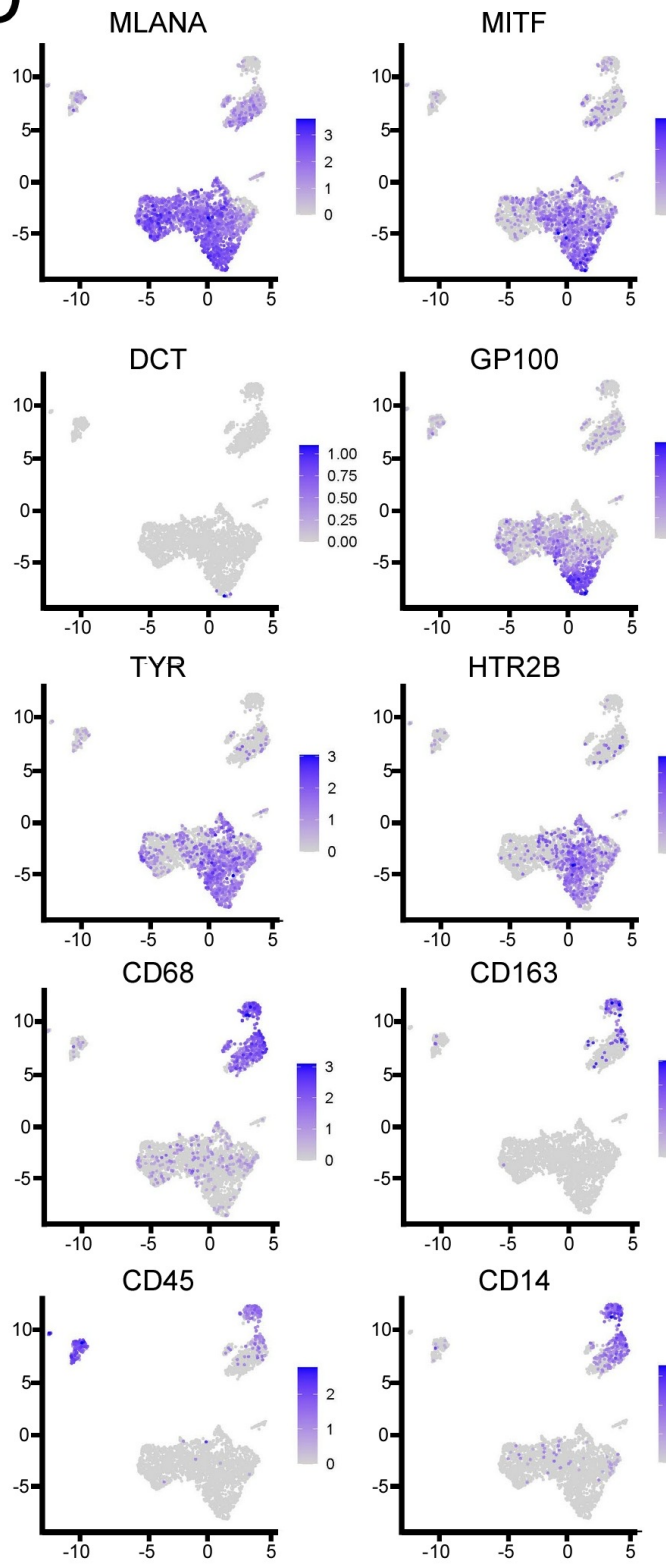

## E

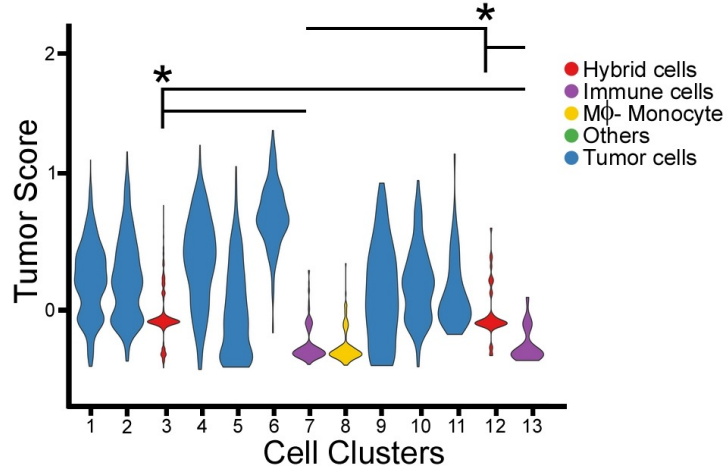

## F

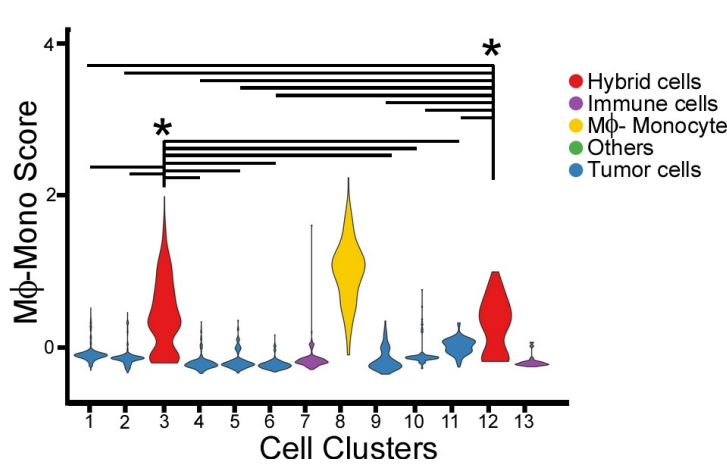

# UMM064

## A

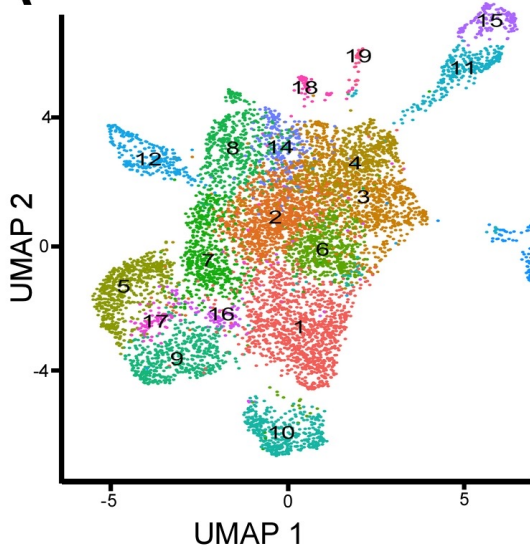

## B

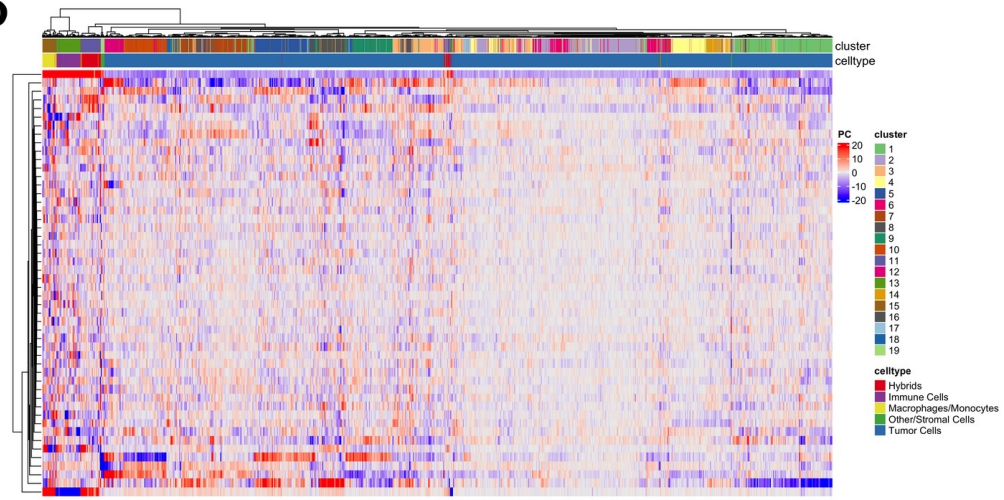

## C

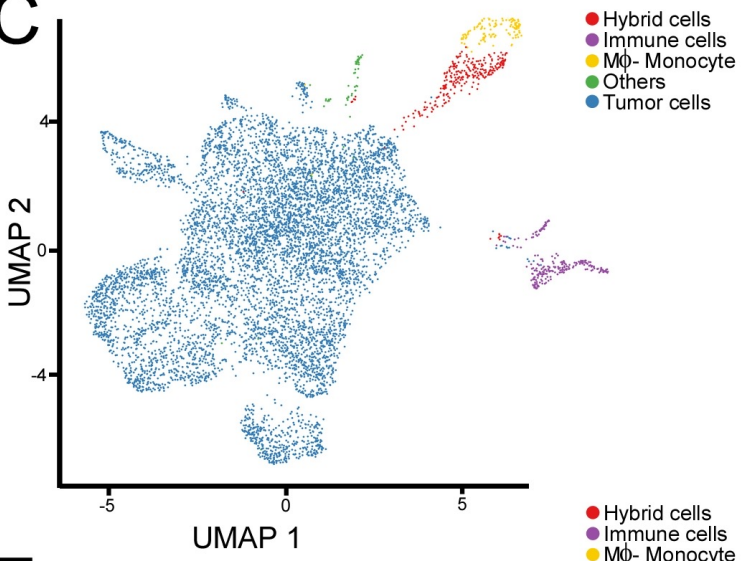

## D

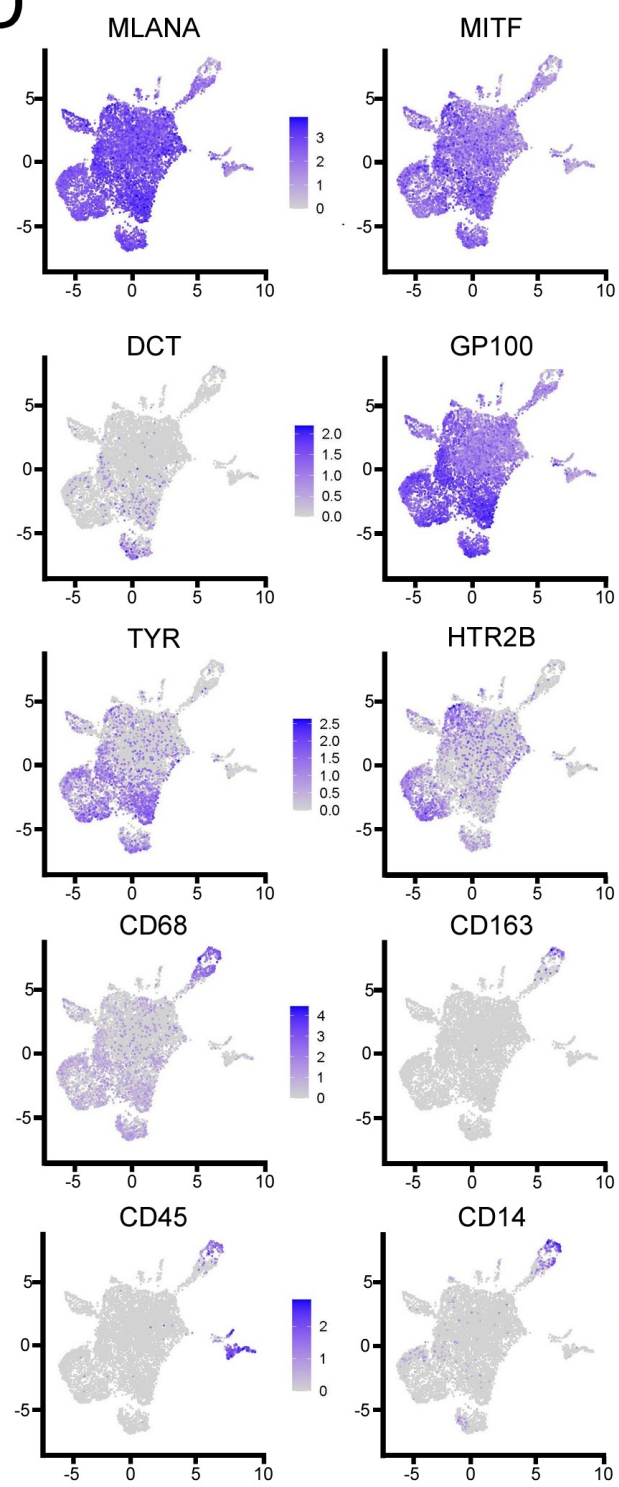

## E

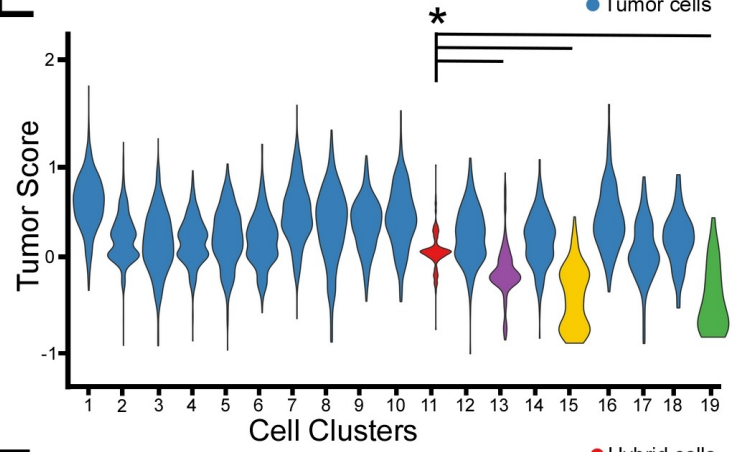

## F

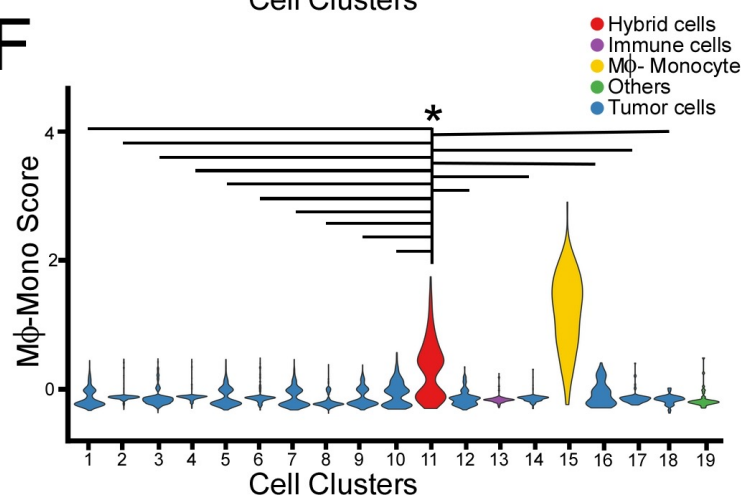

# UMM065

**A**

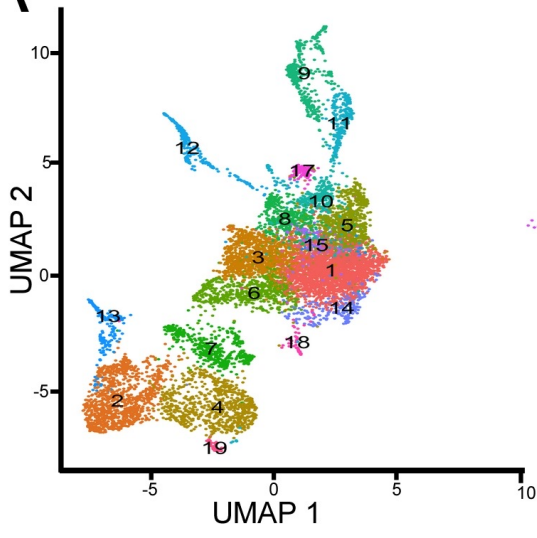

**B**

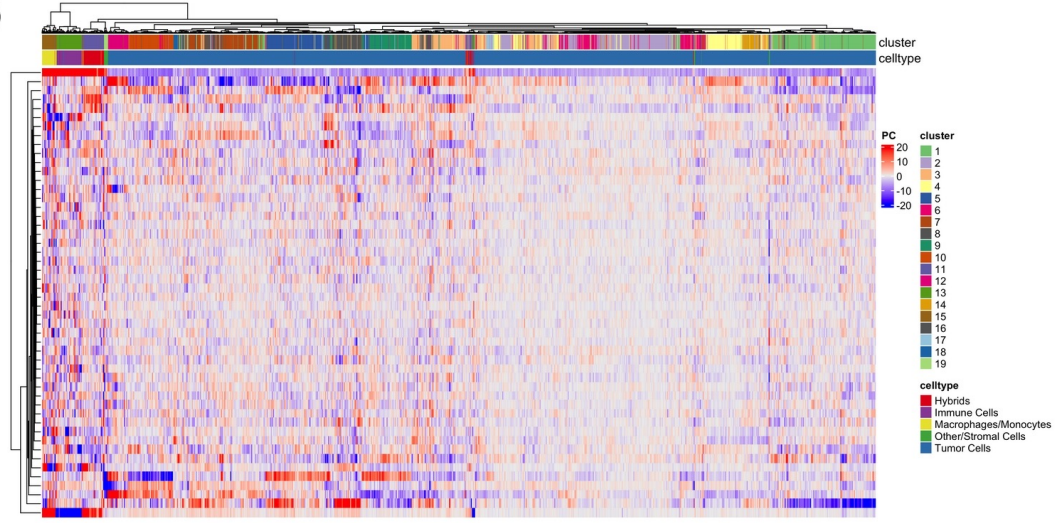

**C**

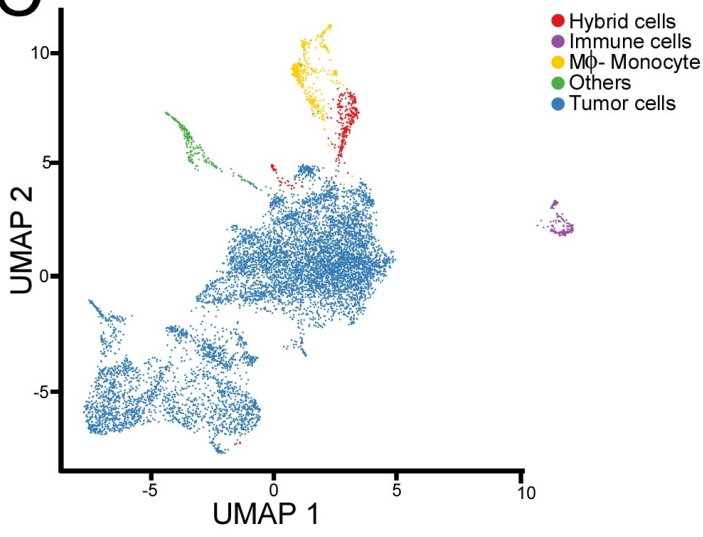

**D**

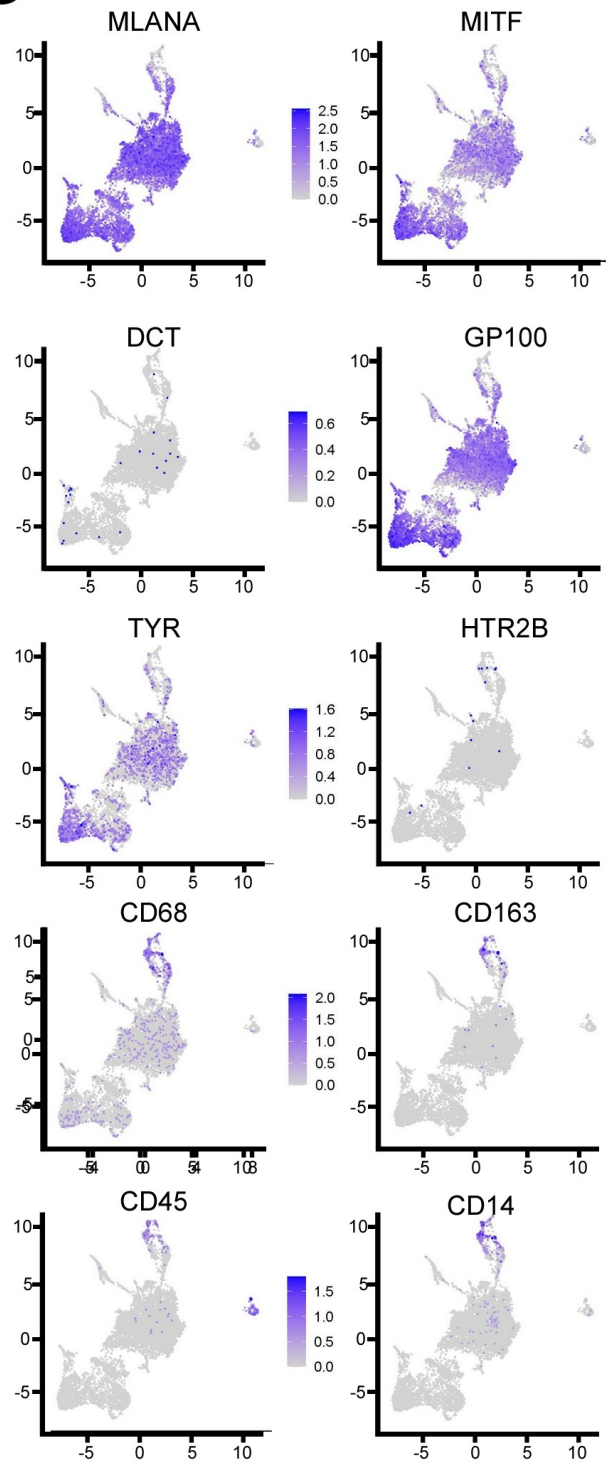

**E**

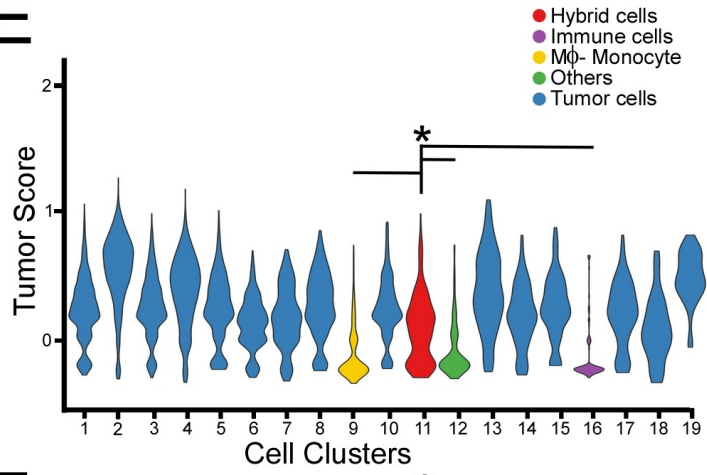

**F**

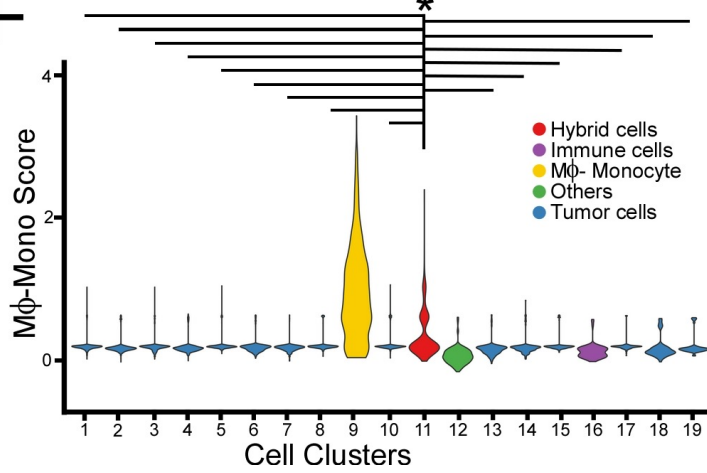

# UMM066

**A**

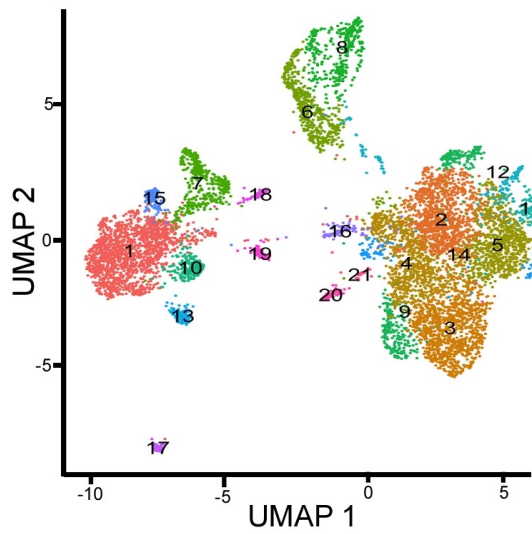

**B**

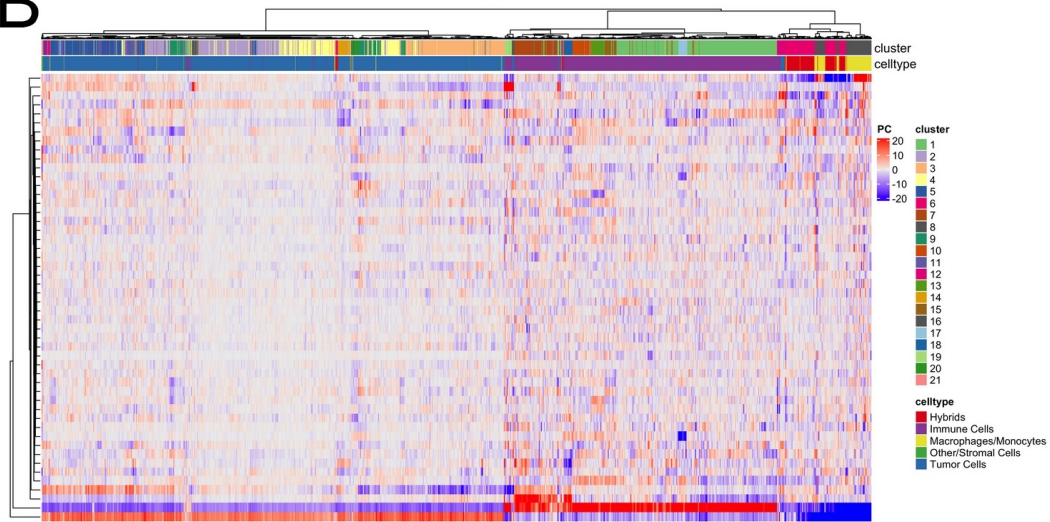

**C**

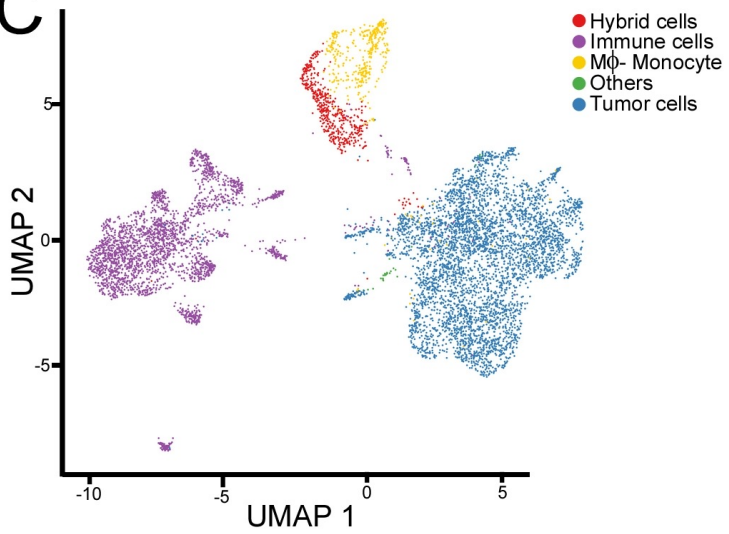

**D**

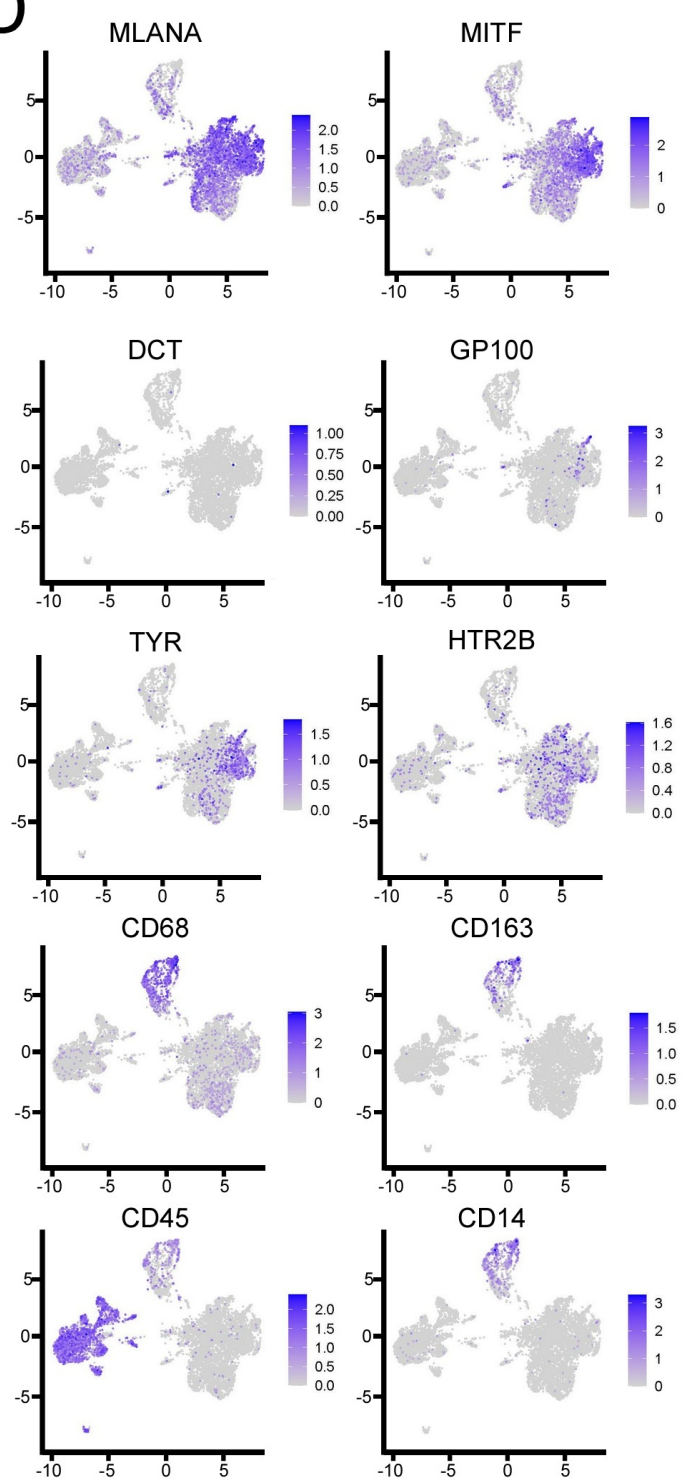

**E**

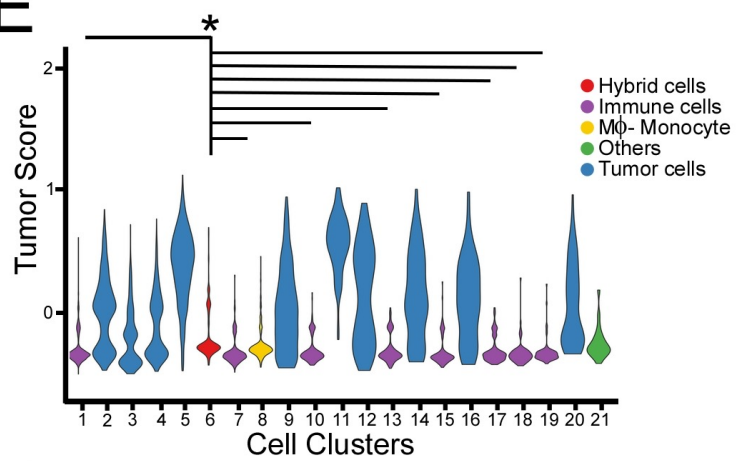

**F**

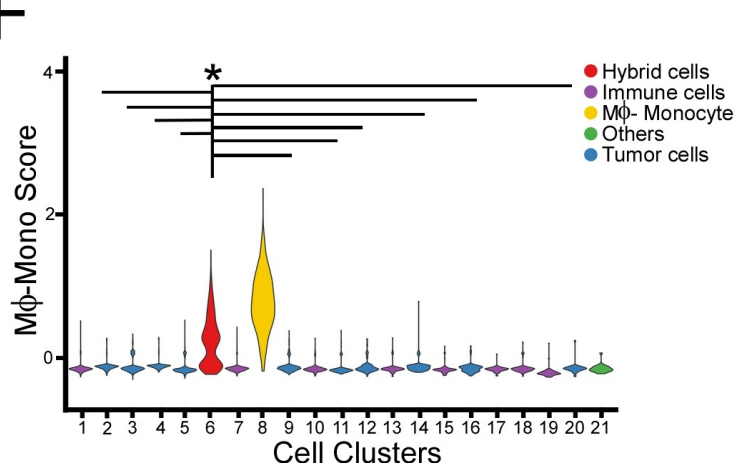

Supplement: 40364_2024_609_MOESM1_ESM.pdf [file 40364_2024_609_MOESM1_ESM.pdf]
