# Supplementary material for: Detection of neoplastic-immune hybrid cells with metastatic properties in uveal melanoma
Source: PubMed Central journal article supplement (PMC11264923; doi:10.1186/s40364-024-00609-6), 2024-07-20

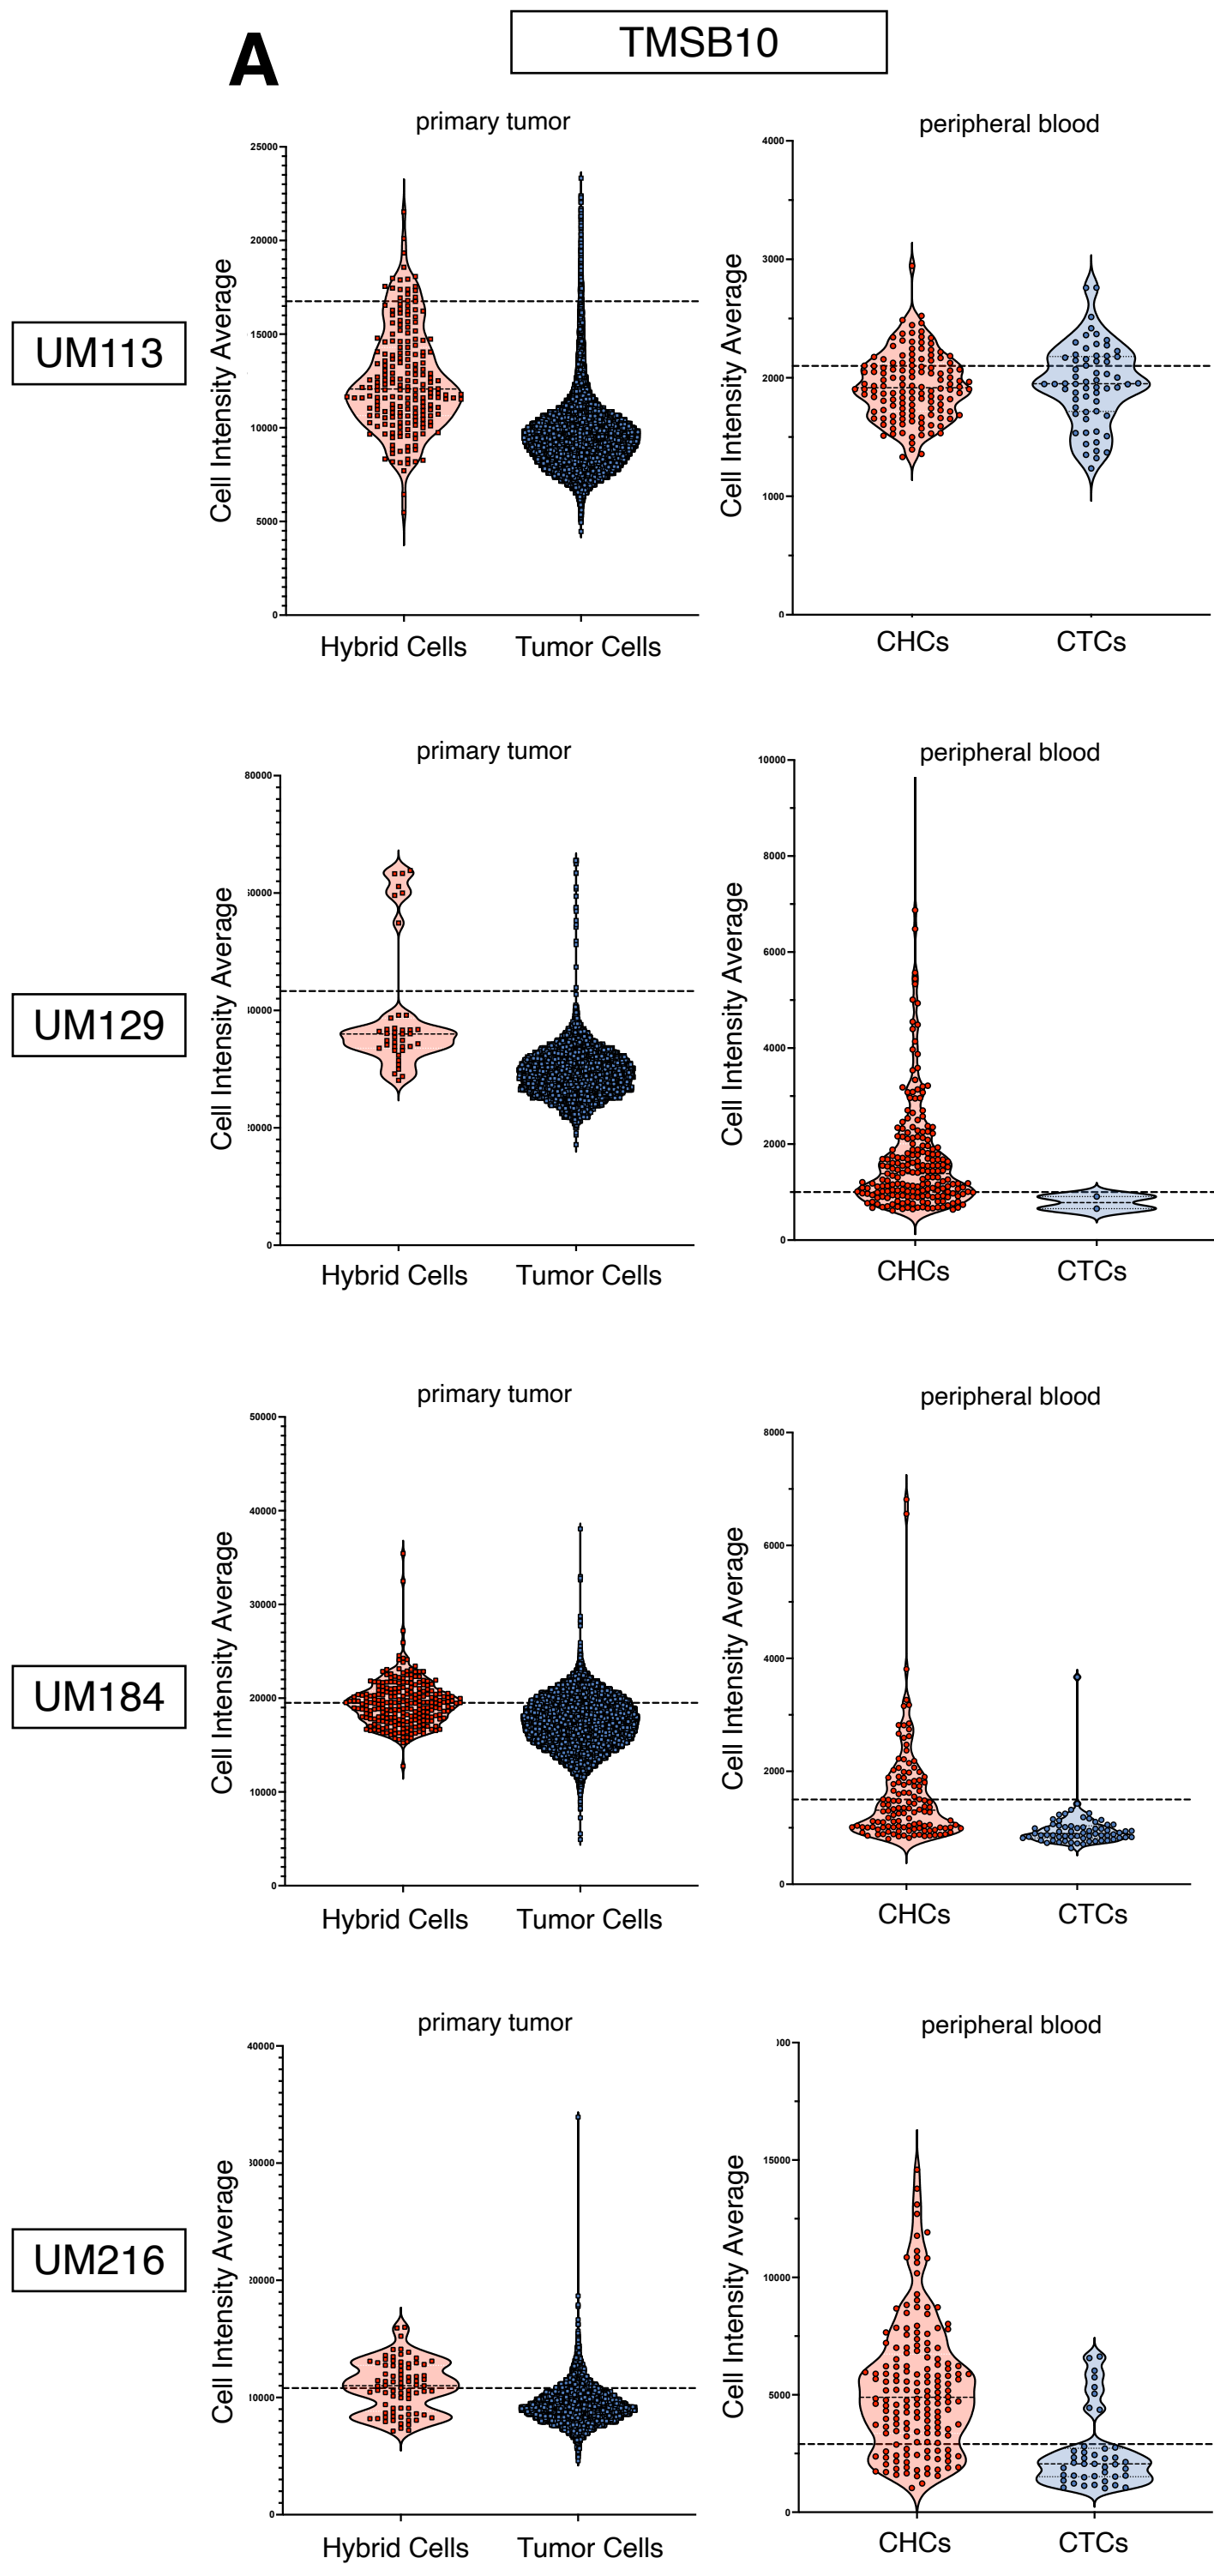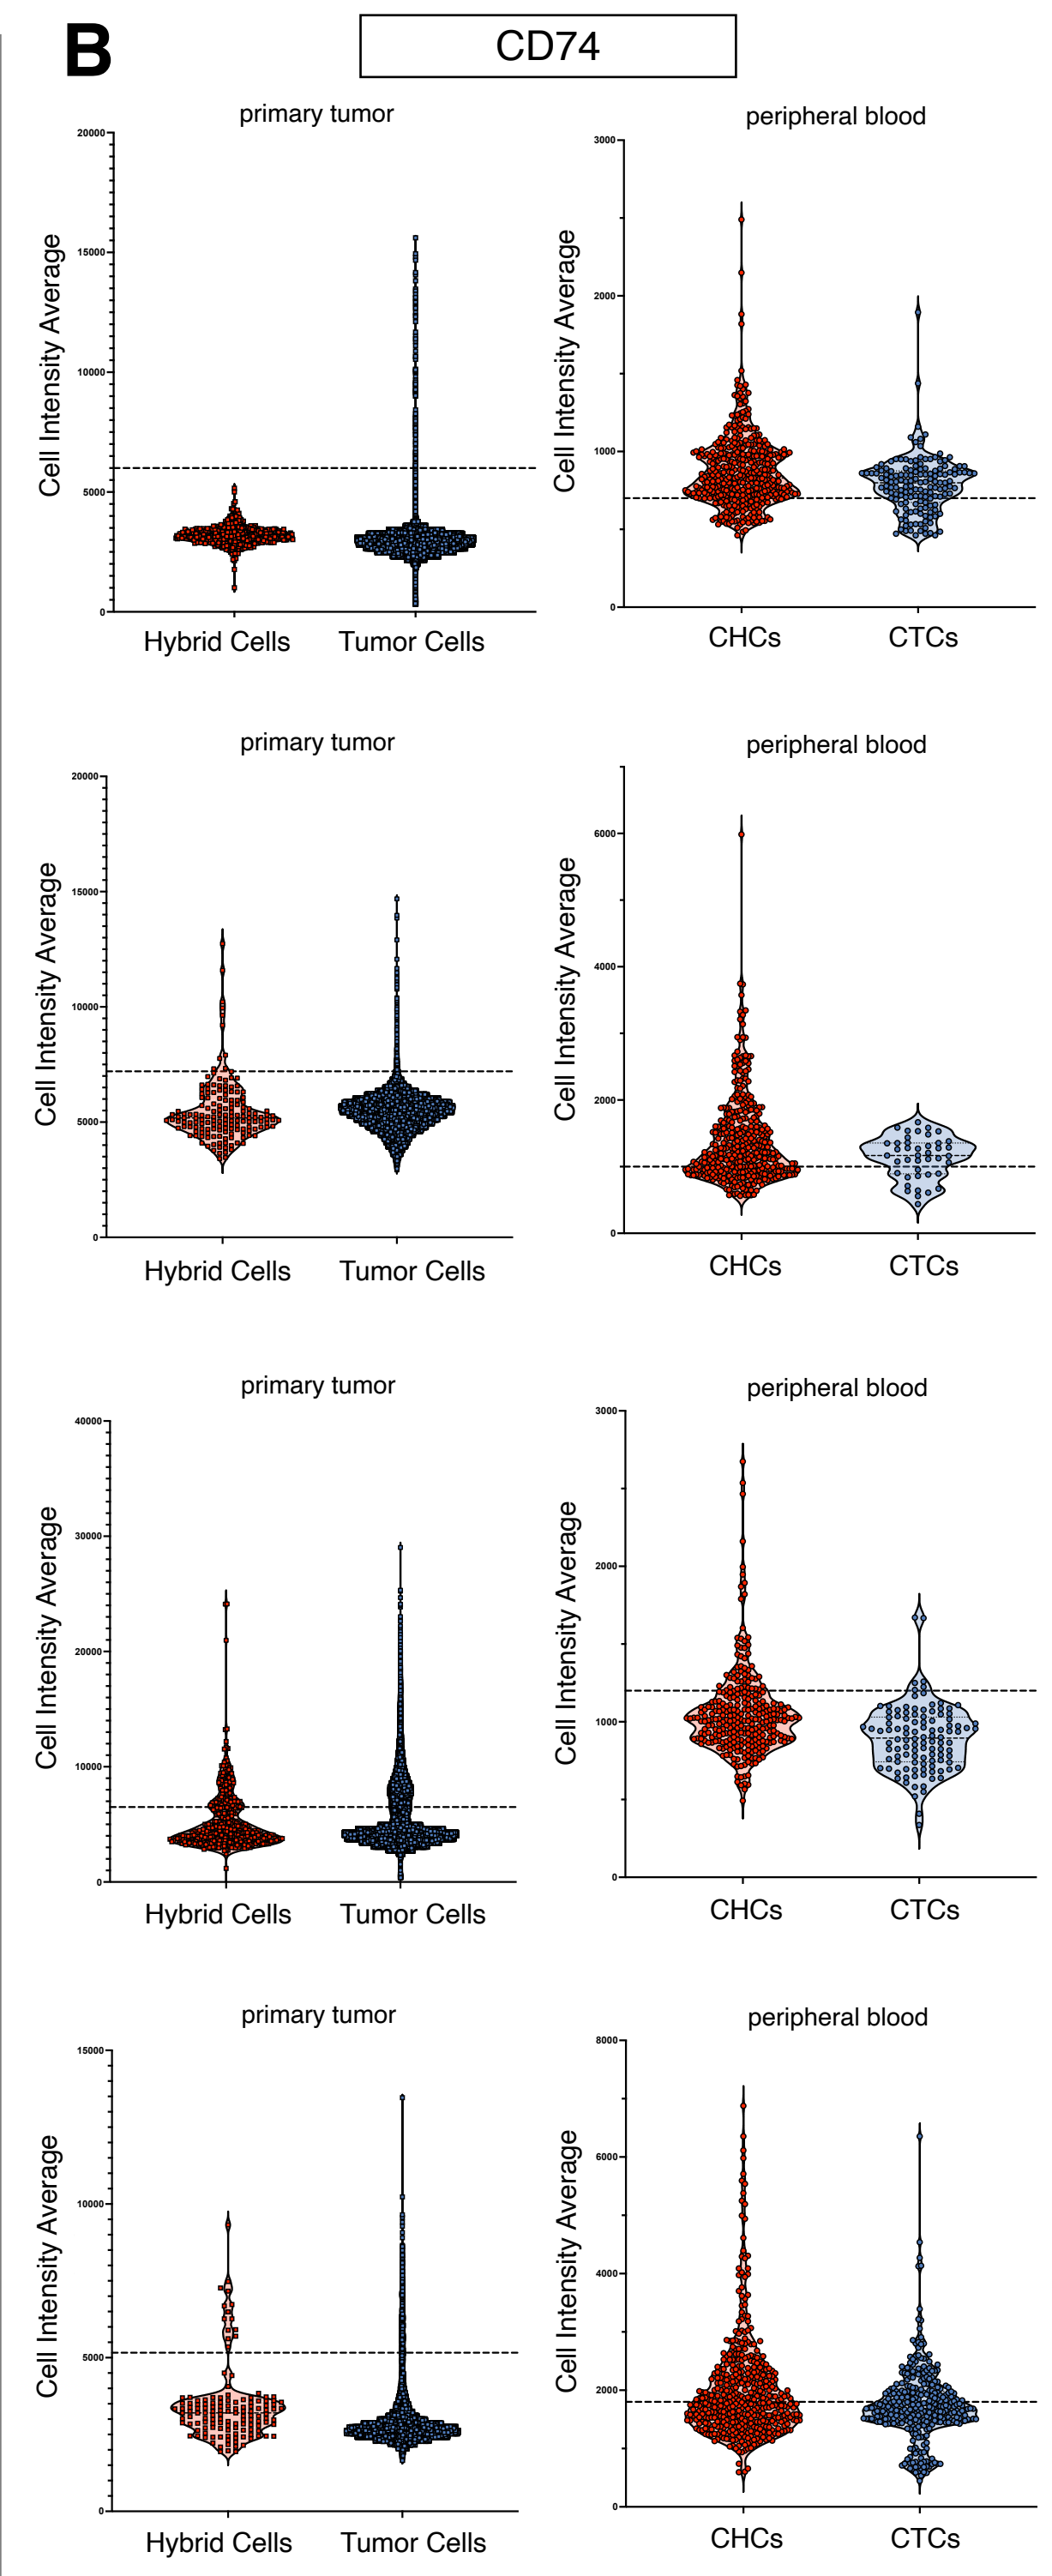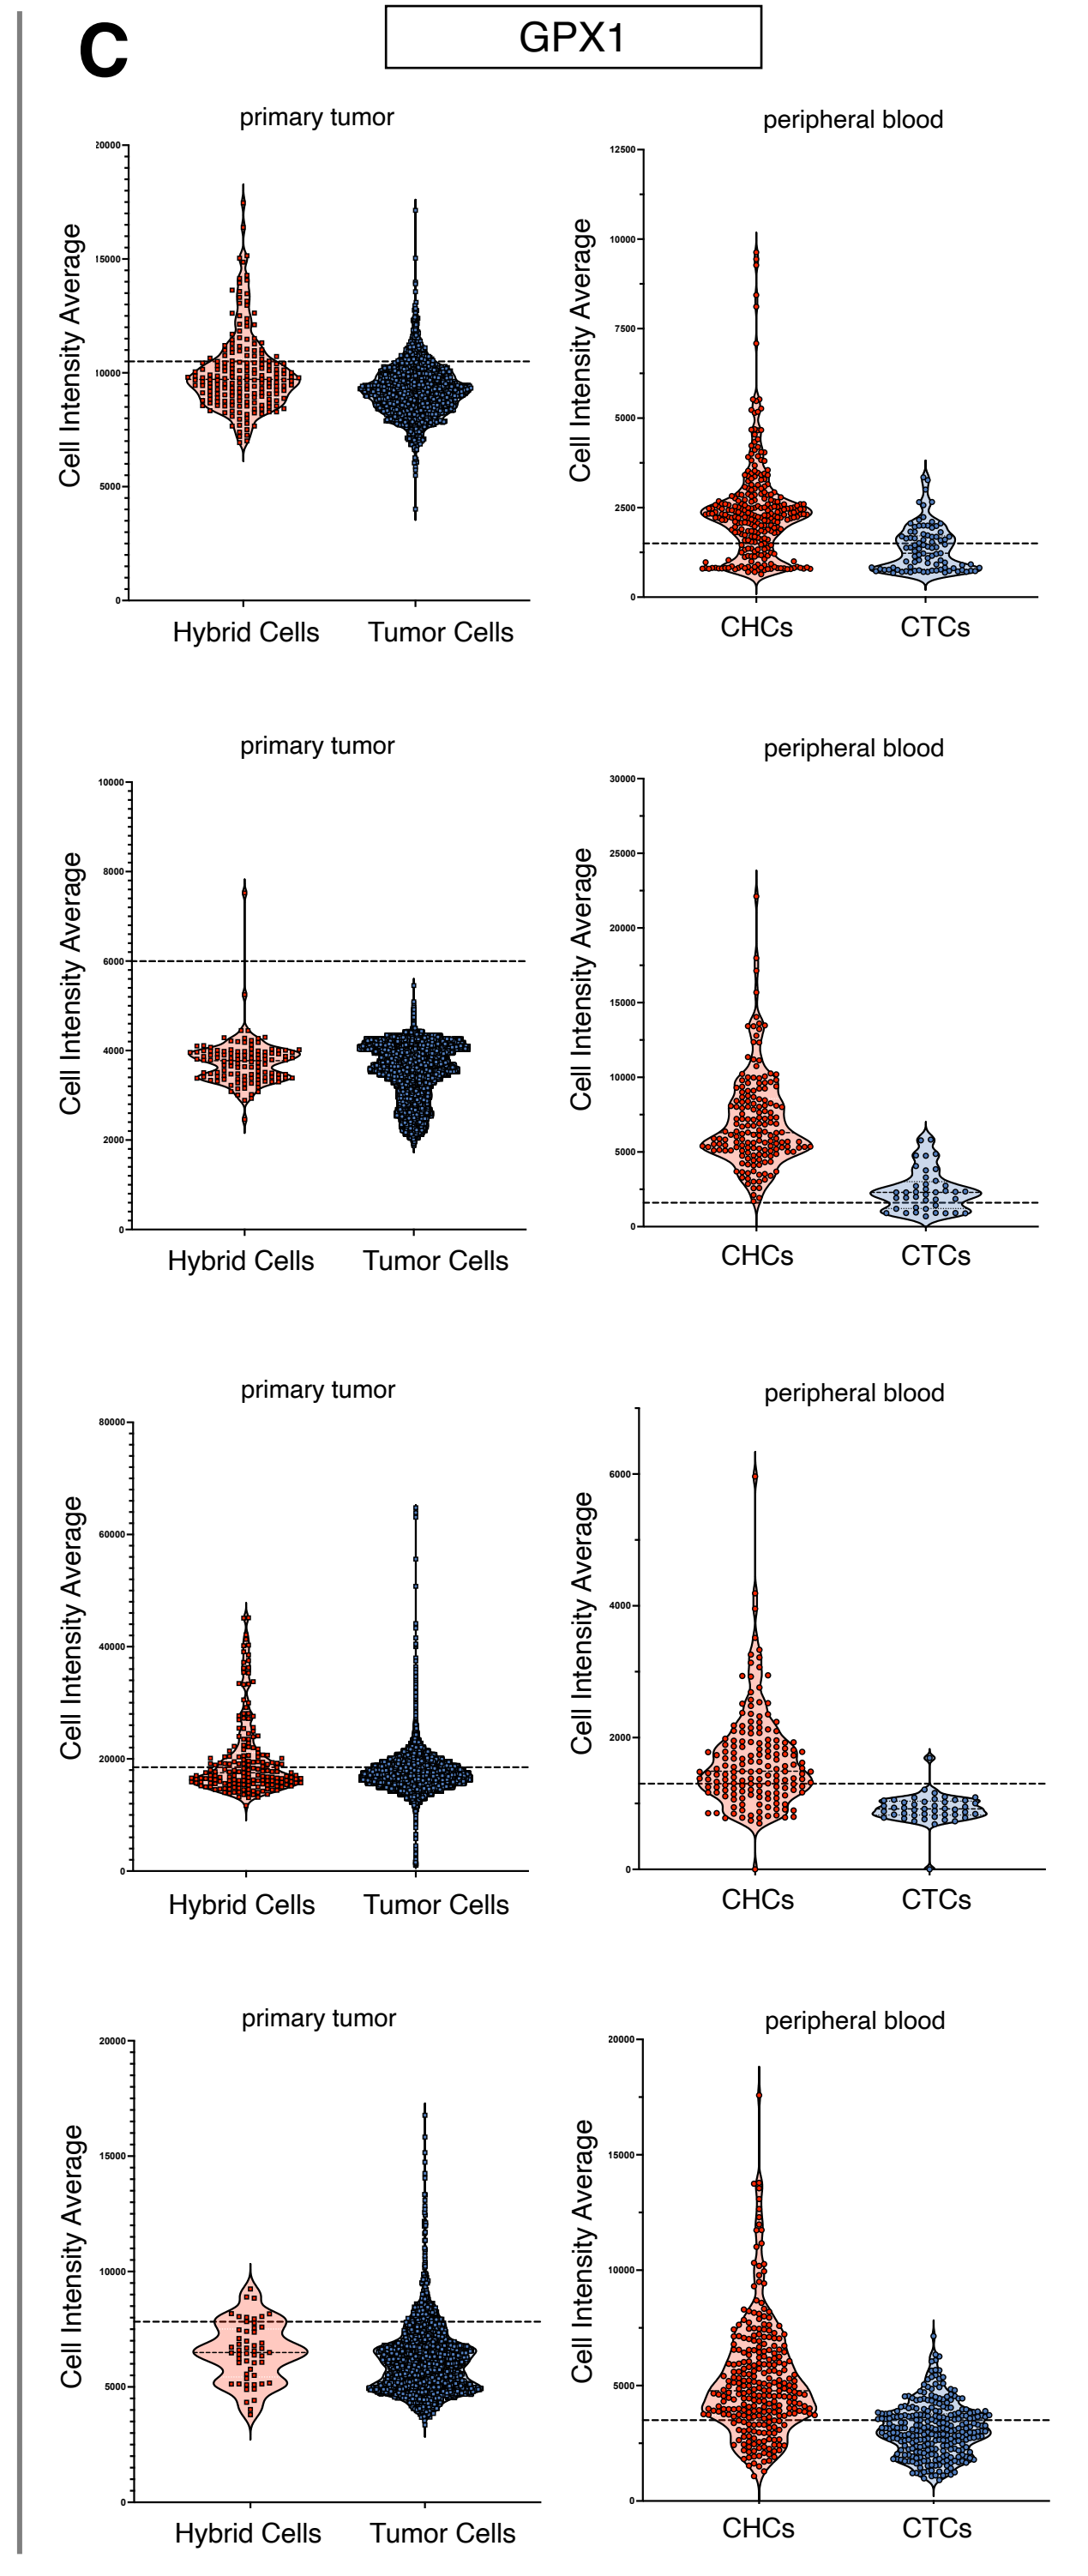

Supplement: 40364_2024_609_MOESM3_ESM.pdf [file 40364_2024_609_MOESM3_ESM.pdf]
